# Supplementary material for: Establishing Healthy Eating ‘Habits’: A Pilot Randomised Controlled Trial of a Habit-Based Dietary Intervention following Oral Rehabilitation for Older Adults
Source: MDPI journal article supplement (doi:10.3390/nu15030731), 2023-02-01
Supplement: s1 [file s1]

**Supplementary Table S1: Mean daily nutrient intake differences between randomisation groups**

| Nutrient         | Group | Baseline            | Change from baseline to 6 weeks | Difference between groups at 6 weeks |      | Change from baseline to 4 months | Difference between groups at 4 months |      | Change from baseline to 8 months | Difference between groups at 8 months |      |
|------------------|-------|---------------------|---------------------------------|--------------------------------------|------|----------------------------------|---------------------------------------|------|----------------------------------|---------------------------------------|------|
|                  |       | Mean (SD)           | Mean (SD)                       | Mean (95%CI)                         | P    | Mean (SD)                        | Mean (95%CI)                          | P    | Mean (SD)                        | Mean (95%CI)                          | P    |
| Energy kcal/d    | IG    | 1613.32<br>(416.94) | 57.58<br>(454.52)               |                                      |      | 39.85<br>(599.44)                |                                       |      | 31.87<br>(631.35)                |                                       |      |
|                  | CG    | 1661.18<br>(460.92) | 38.91<br>(267.53)               | -18.67<br>(-254.55, 217.20)          | 0.87 | -12.21<br>(207.48)               | -52.06<br>(-393.70, 289.58)           | 0.75 | -114.36<br>(304.88)              | -146.23<br>(-515.16, 222.70)          | 0.42 |
| Protein g/d      | IG    | 67.48<br>(19.24)    | 11.65<br>(21.43)                |                                      |      | 4.78 (21.13)                     |                                       |      | 3.32<br>(26.51)                  |                                       |      |
|                  | CG    | 73.25<br>(16.10)    | -0.15<br>(12.70)                | -11.80<br>(-23.88, 0.28)             | 0.06 | -1.77 (15.01)                    | -6.55<br>(-18.96, 5.86)               | 0.29 | -6.10<br>(11.80)                 | -9.41<br>(-24.78, 5.95)               | 0.21 |
| Fat g/d          | IG    | 63.65<br>(20.03)    | -2.35<br>(27.33)                |                                      |      | -0.87 (31.39)                    |                                       |      | -0.51<br>(30.42)                 |                                       |      |
|                  | CG    | 65.01<br>(18.98)    | 5.38 (17.71)                    | 7.73<br>(-6.91, 22.38)               | 0.29 | -0.45 (12.22)                    | 0.42<br>(-17.61, 18.45)               | 0.96 | -5.32<br>(16.87)                 | -4.81<br>(-22.89, 13.27)              | 0.59 |
| Sat Fat g/d      | IG    | 24.78<br>(9.09)     | -0.36 (9.96)                    |                                      |      | 0.29 (10.97)                     |                                       |      | 0.33<br>(10.85)                  |                                       |      |
|                  | CG    | 24.97<br>(8.20)     | 2.17 (8.91)                     | 2.53<br>(-3.61, 8.67)                | 0.41 | -0.49 (4.84)                     | -0.77<br>(-7.14, 5.60)                | 0.80 | -1.23<br>(7.00)                  | -1.56<br>(-8.17, 5.06)                | 0.63 |
| Mono Fat g/d     | IG    | 22.74<br>(7.67)     | -1.84 (9.86)                    |                                      |      | -0.45 (12.76)                    |                                       |      | -0.43<br>(12.59)                 |                                       |      |
|                  | CG    | 22.56<br>(7.16)     | 1.22 (7.54)                     | 3.06 (-2.58, 8.70)                   | 0.28 | -0.78 (5.77)                     | -0.33<br>(-7.75, 7.10)                | 0.93 | -2.21<br>(7.78)                  | -1.77<br>(-9.39, 5.84)                | 0.63 |
| Omega 3 FA g/d   | IG    | 1.37<br>(1.18)      | -0.34 (1.37)                    |                                      |      | -0.42 (1.47)                     |                                       |      | -0.26<br>(1.91)                  |                                       |      |
|                  | CG    | 1.33<br>(0.85)      | 0.29 (1.52)                     | 0.62<br>(-0.33, 1.58)                | 0.19 | 0.02 (1.18)                      | 0.45<br>(-0.47, 1.36)                 | 0.33 | 1.30<br>(0.28)                   | 0.24 (-0.84, 1.33)                    | 0.65 |
| Omega 6 FA g/d   | IG    | 4.60<br>(2.49)      | -1.11 (2.79)                    |                                      |      | -0.43 (3.24)                     |                                       |      | -0.57<br>(3.16)                  |                                       |      |
|                  | CG    | 4.92<br>(2.50)      | 0.09 (3.42)                     | 1.20<br>(-0.87, 3.27)                | 0.25 | -0.42 (2.97)                     | 0.01<br>(-2.14, 2.15)                 | 0.99 | -1.08<br>(2.55)                  | -0.51 (-2.45, 1.43)                   | 0.60 |
| Carbohydrate g/d | IG    | 177.16<br>(47.53)   | 9.78 (54.63)                    |                                      |      | 4.24 (73.15)                     |                                       |      | 7.09<br>(83.40)                  |                                       |      |
|                  | CG    | 181.19<br>(74.64)   | 2.51 (39.08)                    | -7.28<br>(-39.34, 24.79)             | 0.65 | 3.12 (40.70)                     | -1.12<br>(-44.80, 42.56)              | 0.96 | -5.90<br>(48.09)                 | -12.99<br>(-57.64, 31.67)             | 0.56 |

| Nutrient        | Group | Baseline         | Change from baseline to 6 weeks | Difference between groups at 6 weeks |      | Change from baseline to 4 months | Difference between groups at 4 months |      | Change from baseline to 8 months | Difference between groups at 8 months |      |
|-----------------|-------|------------------|---------------------------------|--------------------------------------|------|----------------------------------|---------------------------------------|------|----------------------------------|---------------------------------------|------|
|                 |       | Mean (SD)        | Mean (SD)                       | Mean (95%CI)                         | P    | Mean (SD)                        | Mean (95%CI)                          | P    | Mean (SD)                        | Mean (95%CI)                          | P    |
| Free sugars g/d | IG    | 35.57<br>(17.15) | -8.15<br>(20.27)                |                                      |      | -4.93 (25.46)                    |                                       |      | -10.15<br>(21.51)                |                                       |      |
|                 | CG    | 35.04<br>(23.70) | -1.84<br>(20.27)                | 6.31<br>(-6.38, 19.01)               | 0.32 | -4.43 (15.40)                    | 0.50<br>(-14.91, 15.91)               | 0.95 | -9.86<br>(14.29)                 | 0.30<br>(-11.81, 12.40)               | 0.96 |
| Fibre g/d       | IG    | 17.00<br>(6.04)  | 4.06 (7.11)                     |                                      |      | 3.46 (8.07)                      | -2.10<br>(-6.86, 2.66)                | 0.37 | 1.87<br>(9.07)                   |                                       |      |
|                 | CG    | 17.80<br>(7.94)  | 0.27 (4.27)                     | -3.78<br>(-7.80, 0.23)               | 0.06 | 1.35 (4.12)                      |                                       |      | 0.51<br>(6.81)                   | -1.36<br>(-6.73, 4.01)                | 0.61 |

Differences between groups (intervention vs. Control) are analysed using Independent sample t-tests. Sample sizes: Change from baseline to 6 weeks, IG (n=17) and CG (n=22); change from baseline to 4 months, IG (n=15) and CG (n=20); change from baseline to 8 months, IG (n=15) and CG (n=21). Abbreviations: IG, intervention group; CG, control group; sat, saturated, mono, monounsaturated; FA, fatty acid.

**Supplementary Table S2: Mean Daily Micronutrient Intake Differences Between Randomization Groups**

| Nutrient          | Group | Baseline           | Change from baseline to 6 weeks | Difference between groups at 6 weeks | <i>P</i> | Change from baseline to 4 months | Difference between groups at 4 months | <i>P</i> | Change from baseline to 8 months | Difference between groups at 8months | <i>P</i> |
|-------------------|-------|--------------------|---------------------------------|--------------------------------------|----------|----------------------------------|---------------------------------------|----------|----------------------------------|--------------------------------------|----------|
|                   |       | Mean (SD)          | Mean (SD)                       | Mean (95%CI)                         |          | Mean (SD)                        | Mean (95%CI)                          |          | Mean (SD)                        | Mean (95%CI)                         |          |
| Vitamin A µg/d    | IG    | 926.54<br>(480.13) | 56.42<br>(617.14)               |                                      |          | -6.73<br>(692.96)                |                                       |          | 68.40<br>(1223.40)               |                                      |          |
|                   | CG    | 967.20<br>(791.47) | 529.78<br>(1579.24)             | 473.35<br>(-349.14, 1295.85)         | 0.25     | 211.58<br>(1264.66)              | 218.30<br>(-518.63, 955.24)           | 0.55     | -231.07<br>(757.49)              | -299.47<br>(-970.44, 371.50)         | 0.37     |
| Vitamin B6 µg/d   | IG    | 2.30<br>(2.35)     | 0.55 (1.68)                     |                                      | 0.70     | 7.02 (24.98)                     |                                       | 0.30     | 2.52<br>(10.44)                  |                                      | 0.28     |
|                   | CG    | 2.28<br>(1.64)     | 0.30 (2.15)                     | -0.25<br>(-1.53, 1.03)               |          | 0.05 (0.73)                      | -6.97<br>(-20.81, 6.86)               |          | -0.54<br>(1.31)                  | -3.07<br>(-8.86, 2.74)               |          |
| Vitamin B12 µg/d* | IG    | 6.08<br>(6.12)     | 17.55<br>(75.23)                |                                      | 0.40     | 0.54 (4.93)                      |                                       | 0.88     | -0.02<br>(8.90)                  |                                      | 0.95     |
|                   | CG    | 4.75<br>(2.16)     | 1.87 (6.45)                     | -15.68<br>(-54.43, 23.08)            |          | 0.78 (4.35)                      | 0.25<br>(-2.95, 3.45)                 |          | 0.12<br>(2.60)                   | 0.14<br>(-4.88, 5.17)                |          |
| Folate µg/d       | IG    | 246.27<br>(129.39) | 90.95<br>(164.21)               |                                      | 0.75     | 167.85<br>(331.03)               |                                       | 0.15     | -14.73<br>(146.35)               |                                      | 0.52     |
|                   | CG    | 321.22<br>(284.97) | 12.07<br>(108.49)               | -31.001<br>(-227.85, 165.84)         |          | 33.34<br>(103.67)                | -134.50<br>(-322.18, 53.17)           |          | -50.43<br>(170.77)               | -35.70<br>(-146.24, 75.02)           |          |
| Vitamin C mg/d    | IG    | 121.62<br>(222.73) | 12.07<br>(108.49)               |                                      | 0.21     | 23.27<br>(193.40)                |                                       | 0.56     | 22.34<br>(239.53)                |                                      | 0.52     |
|                   | CG    | 109.91<br>(80.75)  | 54.81<br>(94.79)                | -42.73<br>(-109.99, 24.52)           |          | -4.41 (67.05)                    | -27.68<br>(-122.08, 66.73)            |          | -13.42<br>(70.38)                | -35.77<br>(-147.69, 76.15)           |          |
| Vitamin D µg/d*   | IG    | 4.36<br>(3.24)     | -0.36 (3.69)                    |                                      | 0.29     | -1.43 (3.29)                     |                                       | 0.15     | -0.87<br>(3.60)                  |                                      | 0.65     |
|                   | CG    | 5.34<br>(4.75)     | 2.75 (11.49)                    | 3.11 (-2.77, 8.99)                   |          | 1.08 (5.86)                      | 2.52<br>(-0.92, 5.95)                 |          | 0.47<br>(11.01)                  | 1.34<br>(-4.67, 7.35)                |          |
| Iron mg/d         | IG    | 10.18<br>(4.06)    | 0.49 (3.06)                     |                                      | 0.58     | 0.45 (4.06)                      |                                       | 0.68     | -0.14<br>(5.25)                  |                                      | 0.64     |
|                   | CG    | 11.23<br>(4.97)    | 3.49 (22.13)                    | 3.00<br>(-7.98, 13.99)               |          | 1.79 (11.69)                     | 1.34<br>(-5.09, 7.77)                 |          | -0.77<br>(2.77)                  | -0.63<br>(-3.37, 2.10)               |          |
| Calcium mg/d      | IG    | 746.61<br>(298.92) | 228.60<br>(372.80)              |                                      | 0.19     | 156.43<br>(369.29)               |                                       | 0.11     | 95.10<br>(366.05)                |                                      | 0.05     |
|                   | CG    | 834.96<br>(401.72) | 89.74<br>(224.43)               | -138.86<br>(-349.66, 71.94)          |          | -15.83<br>(164.88)               | -172.26<br>(-386.86, 42.35)           |          | -146.48<br>(340.82)              | -241.58<br>(-483.02, -0.14)          |          |

|                           |    |                     |                    |                              |             |                     |                              |      |                     |                             |      |
|---------------------------|----|---------------------|--------------------|------------------------------|-------------|---------------------|------------------------------|------|---------------------|-----------------------------|------|
| <b>Magnesium<br/>mg/d</b> | IG | 261.94<br>(85.97)   | 59.07<br>(87.40)   |                              |             | 50.75<br>(118.48)   |                              |      | 25.34<br>(118.90)   |                             |      |
|                           | CG | 271.80<br>(89.87)   | 33.08<br>(130.09)  | -25.99<br>(-100.32, 48.35)   | 0.48        | 30.14 (85.22)       | -20.61<br>(-90.58, 49.35)    | 0.55 | 3.42<br>(74.31)     | -21.93<br>(-87.35, 43.50)   | 0.50 |
| <b>Potassium<br/>mg/d</b> | IG | 2742.37<br>(761.63) | 517.11<br>(776.61) |                              |             | 502.78<br>(1078.21) |                              |      | 221.70<br>(1155.55) |                             |      |
|                           | CG | 2763.02<br>(798.57) | 64.71<br>(453.89)  | -452.40<br>(-889.19, -15.61) | <b>0.04</b> | -41.48<br>(523.92)  | -544.25<br>(-1176.52, 88.02) | 0.09 | -40.77<br>(774.69)  | -262.47<br>(321.22, 390.33) | 0.42 |
| <b>Iodine µg/d</b>        | IG | 138.53<br>(81.60)   | 44.38<br>(113.69)  |                              |             | 30.34 (86.26)       |                              |      | 10.40<br>(100.52)   |                             |      |
|                           | CG | 155.38<br>(82.56)   | 36.26<br>(245.92)  | -8.12<br>(-138.84, 122.59)   | 0.89        | 8.98 (135.05)       | -21.36<br>(-102.57, 59.85)   | 0.60 | -11.85<br>(79.63)   | -22.25<br>(-83.27, 38.78)   | 0.46 |

Differences between groups (intervention vs. Control) are analysed using Independent sample t-tests. Change from baseline to 6 weeks, IG (n=17) and CG (n=22); change from baseline to 4 months, IG (n=15) and CG (n=20); change from baseline to 8 months, IG (n=15) and CG (n=21). Abbreviations: IG, intervention group; CG, control group.
